# Supplementary material
Source: PubMed Central journal article supplement (PMC3907357)
Supplement: halms850199-supplement_1.pdf [file halms850199-supplement_1.pdf]

Appendix 1A: List of the Three-City study coded substances that required renal dose adjustment and recommended eGFR threshold in mL/min/1.73 m<sup>2</sup> classified by WHO-Anatomical Therapeutic Chemical (ATC) code

| ATC code | Substance or substance class requiring renal dose adjustment | eGFR threshold | ATC code      | Substance or substance class requiring renal dose adjustment | eGFR threshold |
|----------|--------------------------------------------------------------|----------------|---------------|--------------------------------------------------------------|----------------|
| A02BA01  | cimetidine                                                   | <50            | J01DC04       | cefaclor                                                     | <30            |
| A02BA02  | ranitidine                                                   | <50            | J01DC07       | cefotiam                                                     | <30            |
| A02BA03  | famotidine                                                   | <30            | J01DD08       | cefixime                                                     | <30            |
| A02BA04  | nizatidine                                                   | <50            | J01DD13       | cefepodoxime                                                 | <60            |
| A03FA02  | Cisapride                                                    | <60            | J01E          | <i>Sulfonamides and trimethoprim</i>                         | <30            |
| A03FA03  | domperidone                                                  | <60            | J01MA         | <i>Fluoroquinolones</i>                                      | <30            |
| C01AA05  | digoxin                                                      | <60            | J01MA12       | levofloxacin                                                 | <60            |
| C01BA03  | disopyramide                                                 | <60            | J01MB02       | nalidixic acid                                               | <15            |
| C01BC04  | flecainide                                                   | <30            | J01XX01       | fosfomycin                                                   | <60            |
| C02AB    | methylodopa                                                  | <50            | J05AB01       | aciclovir                                                    | <50            |
| C02CA02  | indoramin                                                    | 30 - 60        | J05AB11       | valaciclovir                                                 | <50            |
| C02AC05  | moxonidine                                                   | <60            | J05AF02       | didanosine                                                   | <60            |
| C02AC06  | rilmenidine                                                  | <80            | J05AF04       | stavudine                                                    | <60            |
| C03CA    | <i>Sulfonamides, plain</i>                                   | <30            | L01BA01       | methotrexate                                                 | <60            |
| C03DB01  | amiloride                                                    | 30-60          | M01AX21       | diacerein                                                    | <30            |
| C04AX20  | bufloamedil                                                  | <40            | M04AA01       | allopurinol                                                  | <80            |
| C07AA07  | sotalol                                                      | <30            | M05BA         | <i>Bisphosphonates</i>                                       | <60            |
| C07AA12  | nadolol                                                      | <30            | N02AA01       | morphine                                                     | <30            |
| C07AA15  | carteolol                                                    | <60            | N02AB03       | fentanyl                                                     | 30-60          |
| C07AB    | <i>Beta blocking agents, selective</i>                       | <30            | N02AX02       | tramadol                                                     | <60            |
| C09AA01  | captopril                                                    | <40            | N02BA01/51/71 | aspirin                                                      | <60            |
| C09AA02  | enalapril                                                    | <30            | N02BA10       | benorilate                                                   | <60            |
| C09AA04  | perindopril                                                  | <60            | N02BE01/51/71 | acetaminophen                                                | <50            |
| C09AA05  | ramipril                                                     | <30            | N02BE05       | propacetamol                                                 | <50            |
| C09AA06  | quinapril                                                    | <60            | N02CC02       | naratriptan                                                  | <60            |
| C09AA07  | benazepril                                                   | <30            | N03AA02       | phenobarbital                                                | <60            |
| C09AA08  | cilazapril                                                   | <30            | N03AA03       | primidone                                                    | <30            |
| C09AA10  | trandolapril                                                 | <30            | N03AG04       | vigabatrin                                                   | <60            |
| C09AA13  | moexipril                                                    | <40            | N03AX12       | gabapentin                                                   | <60            |
| C09AA16  | imidapril                                                    | <25            | N04BA02       | levodopa and decarboxylase inhibitor                         | <60            |
| C10AA01  | simvastatin                                                  | <60            | N04BB01       | amantadine                                                   | <60            |
| C10AB02  | bezafibrate                                                  | <60            | N05AX08       | risperidone                                                  | <60            |
| C10AB05  | fenofibrate                                                  | <60            | N05BA08       | bromazepam                                                   | <90            |
| G04BE03  | sildenafil                                                   | <30            | N06AX16       | venlafaxine                                                  | <30            |
| J01CA01  | ampicillin                                                   | <30            | N06AX17       | milnacipran                                                  | <60            |
| J01CA02  | pivampicillin                                                | <30            | N06BX17       | adafinil                                                     | <60            |
| J01CA04  | amoxicillin                                                  | <30            | P01BA01       | chloroquine                                                  | <80            |
| J01DC02  | cefuroxime                                                   | <30            | R03CC12       | bambuterol                                                   | <60            |

Appendix 1B: List of the Three-City study coded substances that were contraindicated and recommended eGFR thresholds in mL/min/1.73 m<sup>2</sup> classified by WHO-Anatomical Therapeutic Chemical (ATC) code

| ATC code | Substance or substance class with renal contraindication                    | eGFR threshold |
|----------|-----------------------------------------------------------------------------|----------------|
| A02AB    | <i>Antacids, Aluminium compounds</i>                                        | <30            |
| A02X     | <i>Antacids, other combinations</i>                                         | <30            |
| A07EC03  | olsalazine                                                                  | <30            |
| A10BA02  | metformin                                                                   | <60            |
| A10BB01  | glibenclamide                                                               | <30            |
| A10BB06  | carbutamide                                                                 | <30            |
| A10BB07  | glipizide                                                                   | <30            |
| A10BB09  | gliclazide                                                                  | <30            |
| A10BB12  | glimepiride                                                                 | <30            |
| A10BF01  | acarbose                                                                    | <30            |
| A10BF02  | miglitol                                                                    | <25            |
| B01AA    | <i>Vitamin K antagonists</i>                                                | <30            |
| B01AB04  | dalteparin                                                                  | <30            |
| B01AB05  | enoxaparin                                                                  | <30            |
| B01AB06  | nadroparin                                                                  | <30            |
| B02AA02  | tranexamic acid                                                             | <30            |
| C02AC05  | monoxidine                                                                  | <30            |
| C02L     | <i>Antihypertensives and diuretics in combination</i>                       | <30            |
| C03A     | <i>Low-ceiling diuretics, thiazides</i>                                     | <30            |
| C03B     | <i>Low-ceiling diuretics, excl. thiazides</i>                               | <30            |
| C03D     | <i>potassium-sparing agents</i>                                             | <30            |
| C03E     | <i>diuretics and potassium-sparing agents in combination</i>                | <30            |
| C07B     | <i>Beta blocking agents and thiazides</i>                                   | <30            |
| C07D     | <i>Beta blocking agents, thiazides and other diuretics</i>                  | <30            |
| C09BA    | <i>ACE inhibitors and diuretics</i>                                         | <30            |
| C09DA    | <i>Angiotensin II antagonists and diuretics</i>                             | <30            |
| C10AA07  | rosuvastatin                                                                | <30            |
| C10AX03  | tiadenol                                                                    | <80            |
| G02CB04  | quinagolide                                                                 | <60            |
| G03AA06  | norgestrel and estrogen                                                     | <60            |
| G03BA03  | testosterone                                                                | <60            |
| G04BA    | <i>Other urologicals, incl. antispasmodics, acidifiers</i>                  | <30            |
| G04BE04  | yohimbine                                                                   | <30            |
| H01      | <i>Pituitary and hypothalamic hormones and analogues</i>                    | <30            |
| M01AE02  | naproxen                                                                    | <30            |
| M01AH    | Coxibs                                                                      | <30            |
| M01AX22  | Morniflumate                                                                | <30            |
| M04AB03  | benzbromarone                                                               | <80            |
| M04AC01  | colchicine                                                                  | <30            |
| M05BA    | biphosphonates                                                              | <30            |
| N06AX01  | oxitriptan                                                                  | <30            |
| none     | prazinil                                                                    | <30            |
| R06AE07  | cetirizine                                                                  | <60            |
| S01EC    | <i>Antiglaucoma preparations and miotics, carbonic anhydrase inhibitors</i> | <30            |
